# Supplementary material for: Controlled synthesis of (hk1) preferentially oriented Sb2Se3rod arrays by co-evaporation for photovoltaic applications
Source: Royal Society of Chemistry journal article supplement (doi:10.1039/c9ta08289a), 2019-01-01
Supplement: c9ta08289a1.pdf [file c9ta08289a1.pdf]

## Supplementary Information

### for Controlled synthesis of (*hk1*) preferentially oriented Sb<sub>2</sub>Se<sub>3</sub> rod arrays by co-evaporation for photovoltaic applications

Si-Nae Park<sup>†</sup>, Se-Yun Kim<sup>†</sup>, Sang-Ju Lee, Shi-Joon Sung\*, Kee-Jeong Yang, Jin-Kyu Kang, and Dae-Hwan Kim\*

Division of Energy Technology, *Daegu-Gyeongbuk Institute of Science and Technology (DGIST), Daegu 42988, Republic of Korea*

*\*Corresponding author e-mails: sjsung@dgist.ac.kr (S.-J. Sung), monolith@dgist.ac.kr (D.-H. Kim)*

*<sup>†</sup>These authors contributed equally to the preparation of this paper.*

#### Table of Contents

##### ***S1. Four steps of cluster growth by the diffusion of the adsorbed atoms***

**Figure S1.** Reflectance of Sb<sub>2</sub>Se<sub>3</sub> films grown at 270, 285, 300, 315, and 330 °C of substrate temperature.

**Figure S2.** Film morphology (AFM measurement) of Sb<sub>2</sub>Se<sub>3</sub> films grown at (a) 270, (b) 285, (c) 300, (d) 315, and (e) 330 °C of substrate temperature.

**Figure S3:** Capacitance–voltage measurements of the Sb<sub>2</sub>Se<sub>3</sub> devices synthesized at 270 and 315 °C

### ***S1. Four steps of cluster growth by the diffusion of the adsorbed atoms***

Firstly, the characteristics of the evaporated atom flux is affected by several factors, such as the source evaporation rate (source temperature), distance between the source and substrate, chamber pressure, and chamber gas composition [S1].

Secondly, the adsorption rate on the substrate surface is given by Eq. S1[S1]:

$$r_{ads} = \frac{(N_s - N_a)}{N_s} \alpha r_m, \quad (\text{Eq. S1})$$

where  $r_m$  is the mass transfer rate,  $\alpha$  is the accommodation coefficient, and  $N_s$  and  $N_a$  are the numbers of surface sites per unit area and occupied area, respectively. In our case,  $r_m$  will be applied as a constant because the source temperature is kept constant.

Thirdly, the desorption rate from the substrate surface is given by Eq. S2[S1]:

$$r_{des} = v_o \exp\left(-\frac{\Delta G_{des}}{k_B T_s}\right) N_a, \quad (\text{Eq. S2})$$

where  $v_o$ ,  $k_B$ ,  $T$ ,  $\Delta G_{des}$  are the bulk vibration frequency ( $10^{13}$  Hz), Boltzmann constant, substrate temperature (K), and Gibbs free energy for desorption, respectively. As the substrate temperature increases, the desorption rate increases.

Fourth, the surface diffusion coefficients of the adsorbed atoms during residency can be given by Eq. S3[S1]:

$$D_{surf} \propto v_o \exp\left(-\frac{\Delta G_{surf.diff}}{k_B T_s}\right), \quad (\text{Eq. S3})$$

where  $\Delta G_{surf.diff}$  is the Gibbs free energy for the surface diffusion of an adsorbed atom. As the substrate temperature increases, the surface diffusion coefficient increases.

The density of stable nuclei can be given by Eq. S4[S2]:

$$N^* = n_s \exp\left(-\frac{\Delta G^*}{k_B T_s}\right), \quad (\text{Eq. S4})$$

where  $n_s$  is the total nucleation site density, and  $\Delta G^*$  is the Gibbs free energy at the critical radius of the nuclei.

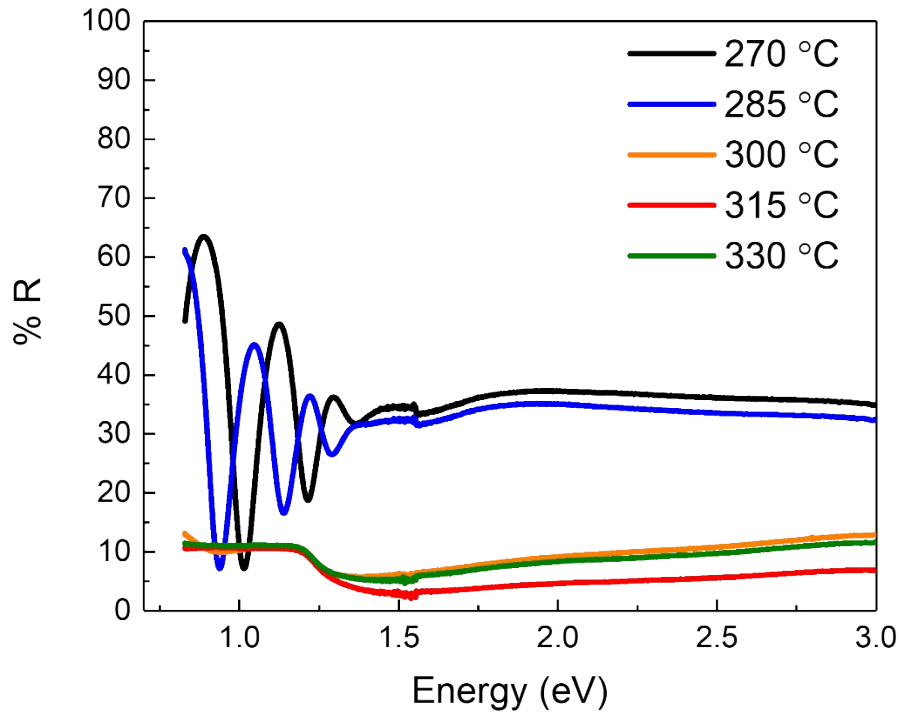

**Figure S1.** Reflectance of  $\text{Sb}_2\text{Se}_3$  films grown at 270, 285, 300, 315, and 330 °C of substrate temperature.

We investigated the reflectance and photovoltaic properties, but it was difficult to distinguish the contribution of each factor. When comparing samples prepared at 270 °C and 315 °C, it seems that the  $J_{\text{SC}}$  increase and the reflectance decrease are about 20%, respectively. As a result, it may be thought that  $J_{\text{SC}}$  is improved by a scattering effect. However, when comparing the 300 °C and the 315 °C samples, 25% of the  $J_{\text{SC}}$  difference exists while there is little reflectance difference. That is, in this case, the effect of scattering effect on the  $J_{\text{SC}}$  increase is negligible. As a result, in view of the  $J_{\text{SC}}$  increase and reflectance curves tendency of each sample, the three-dimensional p-n junction effect seems to contribute more to the  $J_{\text{SC}}$  improvement than the scattering effect.

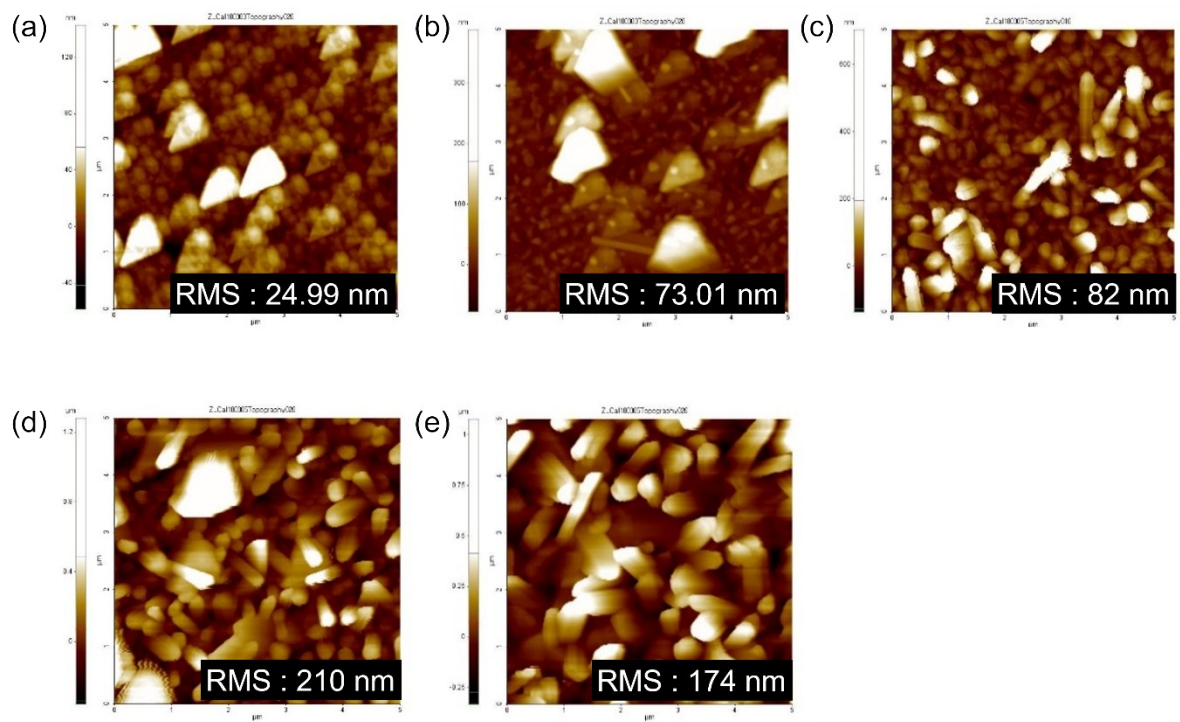

**Figure S2.** Film morphology (AFM measurement) of  $\text{Sb}_2\text{Se}_3$  films grown at (a) 270, (b) 285, (c) 300, (d) 315, and (e) 330 °C of substrate temperature.

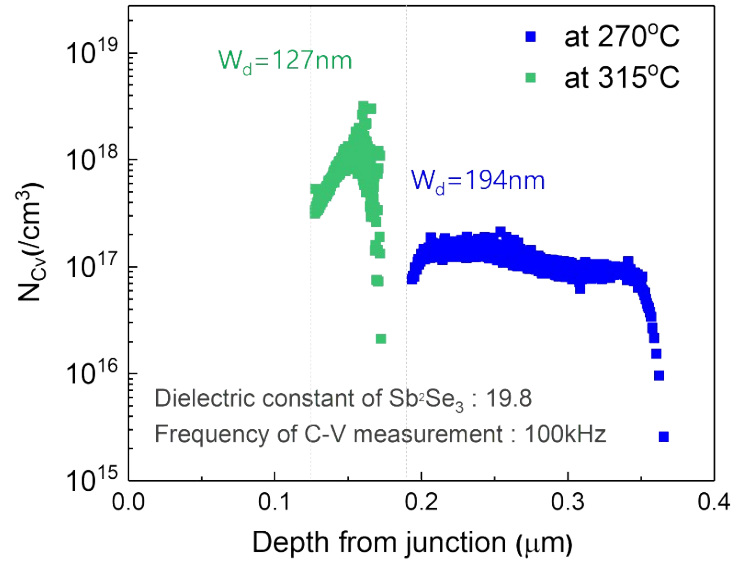

**Figure S3:** Capacitance–voltage measurements of the  $\text{Sb}_2\text{Se}_3$  devices synthesized at 270 and 315 °C.

Depth profile of the charge density ( $N_{C-V}$ ) as shown in Figure S4 can be obtained by measuring the capacitance–voltage (C-V) at RT following the expressions [S3]:

$$N_{C-V}(W) = 2/q\epsilon_0\epsilon_s [d/dV (1/C^2)^{-1}] \quad (\text{Eq. S5})$$

$$W(V) = \epsilon_0\epsilon_s/C(V) \quad (\text{Eq. S6})$$

where,  $W$ ,  $q$ ,  $\epsilon_0$ ,  $\epsilon_s$ , and  $C$  denote the depletion width, elementary charge, di-electric constant, and unit area junction capacitance, respectively.

In our experiments, as a result of C-V measurement conducted at frequency of 100kHz condition, the depletion widths of flat and nano rod films were calculated to be about 193 and 127 nm, respectively, when dielectric constant of  $\text{Sb}_2\text{Se}_3$  was adapted as 19.8 [S4,S5]; the dielectric constant of  $\text{Sb}_2\text{Se}_3$  decrease when frequency increase, and about 19.8 of dielectric constant was obtained at 100kHz frequency [S4]. Based on the result of C-V measurement, it was found that 193nm is the depletion width in the  $\text{Sb}_2\text{Se}_3$  flat film having 550nm thickness, thus the remaining 257nm is the area where the photogenerated carrier collects by diffusion [S4]. On the other hand, since the depletion width is 127nm in the  $\text{Sb}_2\text{Se}_3$  rod array device, it can be seen that most of the volume of the rod is included in the depletion width; the rod width is under about 200nm.

## Reference

- [S1] R. J. Stokes and D. F. Evans, *Fundamentals of Interfacial Engineering*, Wiley, 1996.
- [S2] M. Ohring, in *Materials Science of Thin Films (Second Edition)*, ed. M. Ohring, Academic Press, San Diego, Second Edition., 2002, pp. 357–415.
- [S3] M. M. Islam, M. A. Halim, T. Sakurai, N. Sakai, T. Kato, H. Sugimoto, H. Tampo, H. Shibata, S. Niki, K. Akimoto, *Appl. Phys. Lett.* 106 (2015) 243905
- [S4] C. Chen, D. C. Bobela, Y. Yang, S. Lu, K. Zeng, C. Ge, B. Yang, L. Gao, Y. Zhao, M. C. Beard, J. Tang, *Front. Optoelectron.* 10(1) (2017) 18–30.
- [S5] K. Zeng, D.-J. Xue, J. Tang, *Semicond. Sci. Technol.* 31 (2016) 063001.
